# Supplementary material for: An Electronic Clinical Decision Support System for the Management of Low Back Pain in Community Pharmacy: Development and Mixed Methods Feasibility Study
Source: PubMed Central journal article supplement (PMC7248808; doi:10.2196/17203), 2020-05-11
Supplement: medinform_v8i5e17203_app3.pdf [file medinform_v8i5e17203_app3.pdf]

# Clinical decision support tool for low back pain in community pharmacy

## Page 1. (after landing screen)

Pain history

- Name/age/gender
- New/followup
- Duration
- Progression

History

RESET THE APP CONFIGURE

Enter basic information about your patient

Patient Name Khalid Gender Male

Age 58

Tap the correct response about your patient's back pain

Is this a new or follow-up visit? How long has the patient been in pain? What is the progression of the pain?

New  < 2 weeks  Much Worse

Follow-up  ≥ 2 weeks  A little worse

No change

A little better

Much better

NEXT >

Info History Screening Medicines Advice

## Page 2.

Current medicines

- Type
- Appropriate dose
- Time on medicine

Screening

RESET THE APP CONFIGURE

Ask your patient about the following in relation to low back pain

| Clinical History                                                                                                  | Presentation                                | Possible Condition          | Features Present         |                                      |
|-------------------------------------------------------------------------------------------------------------------|---------------------------------------------|-----------------------------|--------------------------|--------------------------------------|
| New onset of bowel/bladder retention                                                                              | Saddle anaesthesia                          | Cauda Equina Syndrome (CES) | No <input type="radio"/> | Yes <input checked="" type="radio"/> |
| Recent fever/infection OR history of intravenous drug use                                                         |                                             | Spinal Infection            | No <input type="radio"/> | Yes <input checked="" type="radio"/> |
| Age >65y, Osteoporosis, regular systemic corticosteroids >7mg/day                                                 |                                             | Spinal Fracture             | No <input type="radio"/> | Yes <input checked="" type="radio"/> |
| Any 4 of: Age <40y, insidious onset improves with exercise, no improve w. rest, Pain at night improving on rising |                                             | Spinal Inflammation         | No <input type="radio"/> | Yes <input checked="" type="radio"/> |
| History of malignancy in previous 5y                                                                              | Strong clinical suspicion                   | Spinal Malignancy           | No <input type="radio"/> | Yes <input checked="" type="radio"/> |
|                                                                                                                   | Leg pain with altered sensation or weakness | Sciatica or canal stenosis  | No <input type="radio"/> | Yes <input checked="" type="radio"/> |

< BACK CALCULATE >

Info History Screening Medicines Advice

## Page 3.

Current medicines

- Type (enter up to 3)
- Appropriate dose
- Time on medicine

Medicines

RESET THE APP CONFIGURE

Current Medicines (select up to 3)

Current Dose

Time on Medicine

1st Medicine

OTC: Ibuprofen, diclofenac

CLEAR

2nd Medicine

Prescription: NSAID

CLEAR

+ ADD NEW MEDICINE + REMOVE THE MEDICINE

MedCurType: 2

MedCurDose: 1

MedCurTime: 1

Duration: 1

< BACK

NEXT >

Info History Screening Medicines Advice

## Page 4.

Decision support (± modify)

- Self-care advice
- Medicines advice
- Referral advice
- Custom advice

Advice

RESET THE APP CONFIGURE

Summary for Khalid, age 58

Recommendation (accept or modify)

Pathology Screen: Decision - increase in chance of maligna...

Selfcare Advice: Stay active and avoid bed-rest, Due to SCREENING POSITIVE, advise patient to consult GP in 1 week for review if lack of progress.  Accept  Add or Modify

Visit type: First visit

Pain duration: ≥2 weeks

Medicine Advice: Caution: multiple similar medicines. Consider adjusting overall dose and using a heat wrap for up to 2 weeks.  Accept  Add or Modify

Progress: No change

Medicine-1: OTC: Ibuprofen, diclofenac (Dose: Therapeutic, Duration: ≥1 week)  Accept  Add or Modify

Medicine-2: Prescription: NSAID (Dose: Therapeutic, Duration: ≥1 week)

Referral Advice: Consider referral to GP  Accept  Add or Modify

offer additional advice if needed

< BACK SEND CREATE PDF

Info History Screening Medicines Advice
